# Supplementary material for: Influence of silk–silica fusion protein design on silica condensation in vitro and cellular calcification
Source: Royal Society of Chemistry journal article supplement (doi:10.1039/c6ra03706b), 2016-01-01
Supplement: c6ra03706b1.pdf [file c6ra03706b1.pdf]

## **Influence of silk-silica fusion protein design on silica condensation *in vitro* and cellular calcification**

Robyn Plowright<sup>1\*</sup>, Nina Dinjaski<sup>2\*</sup>, Shun Zhou<sup>2</sup>, David J. Belton<sup>1</sup>, David L. Kaplan<sup>2\*\*</sup>, Carole C. Perry<sup>1\*\*</sup>

<sup>1</sup> Biomolecular and Materials Interface Research Group, Interdisciplinary Biomedical Research Centre, School of Science and Technology, Nottingham Trent University, Clifton Lane, Nottingham, UK NG11 8NS

<sup>2</sup> Department of Biomedical Engineering, Tufts University, 4 Colby Street, Medford, Massachusetts, 02155, United States

\*\* To whom correspondence should be addressed:

Carole C. Perry. E-mail [carole.perry@ntu.ac.uk](mailto:carole.perry@ntu.ac.uk) , Tel. 0115 84 86695

David L. Kaplan. E-mail [David.Kaplan@Tufts.edu](mailto:David.Kaplan@Tufts.edu); Tel. (+617) 626 3251; Fax (+617) 627 3231

\* These authors contributed equally to this work.

## Supplementary Data

Material properties of silk films: Peak deconvolution to identify beta content

### a) nh-15mer

#### i) pre-annealing

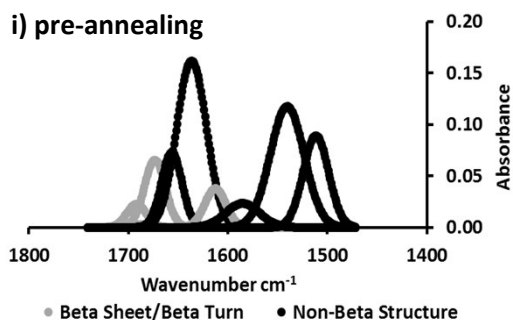

#### ii) post-annealing

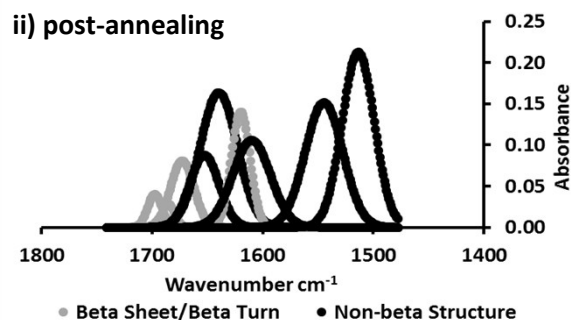

### b) nh-15mer-R5

#### i) pre-annealing

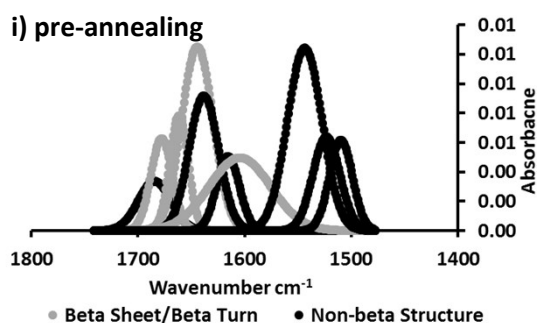

#### ii) post-annealing

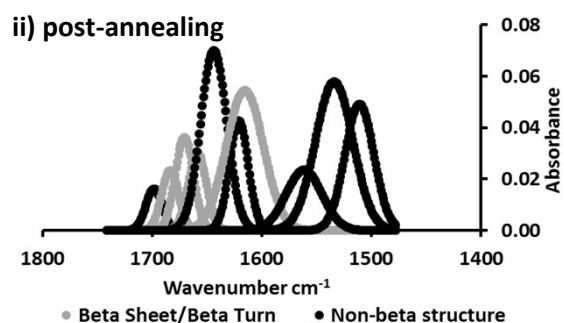

### c) 15mer-ch

#### i) pre-annealing

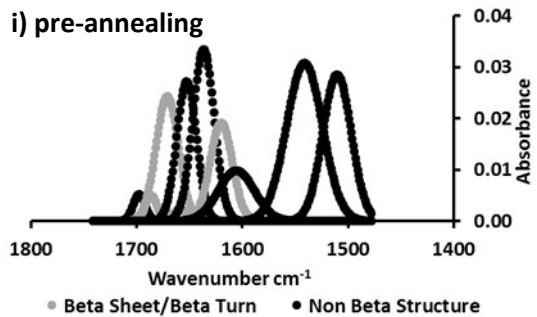

#### ii) post-annealing

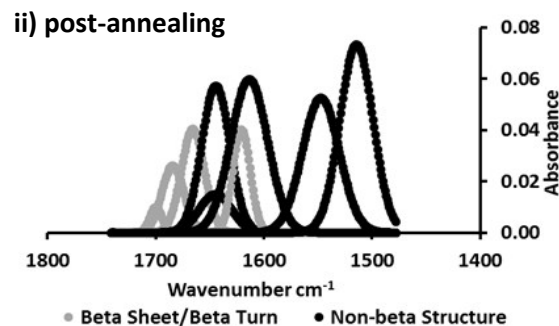

### d) R5-15mer-ch

#### i) pre-annealing

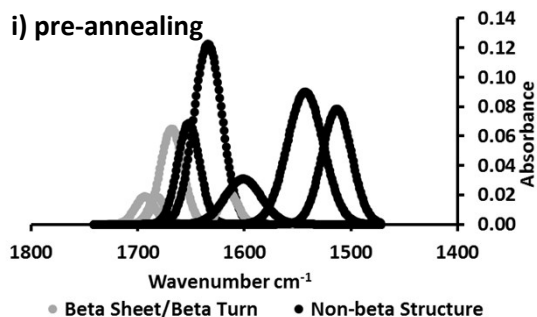

#### ii) post-annealing

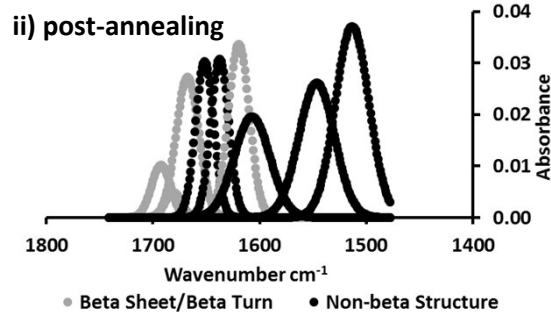

Example data: Comparison of recombinant silk films, nh-15mer, nh-15mer-R5, 15mer-ch, R5-15mer-ch, before and after the methanol annealing process with respect to the changes in protein secondary structure.
